# Supplementary material
Source: PubMed Central journal article supplement (PMC2701511)
Supplement: NIHMS115251-supplement-Supp_.pdf [file NIHMS115251-supplement-Supp_.pdf]

## **Supplemental online materials:**

### **Materials and Methods:**

#### **Mouse Strains**

All mouse strains were obtained from the Jackson Laboratory. Strains used to generate trisomic embryos: Rb(1.2)18Lub/J and Rb(1.3)1Ei/J (Ts1), Rb(11.13)4Bnr/J and Rb(13.16)1Mpl/J (Ts13), Rb(6.16)24Lub and Rb(16.17)7Bnr (Ts16), and Rb(5.19)1Wh/J and Rb(9.19)163H (Ts19). All male compound Robertsonian heterozygous mice were mated with C57BL/6J females and embryos were collected at specific stages of embryogenesis by timed matings. All animal studies and procedures were approved by the MIT Institutional Animal Care and Use Committee.

#### **Mouse Embryonic Fibroblast Derivation and Culture**

Except for trisomy 1 lines, MEF lines were established as in (SI). Ts1 cell lines were created from 10.5 or 11.5 day postcoitum embryos and plated after overnight incubation in trypsin at 4°C followed by incubation for 30min at 37°C. Cells were plated on 1 to 3 6cm plates depending on the size of the embryo isolated. All cells were cultured in DMEM supplemented with 10% FBS, glutamine, penicillin, and streptomycin at 37°C. Cells were cultured at 37°C with 5% CO<sub>2</sub> in a humidified environment. In all experiments, cells were counted using a hemocytometer or Cellometer Auto T4 automated hemacytometer (Nexcelom).

#### **Metaphase Spreads**

Metaphase spreads were generated from early passage cell lines ( $\leq$ p3). Exponentially growing cells were treated with colchicine (Sigma) at 50 $\mu$ g/ml for 4-6 hours. Cells were collected by trypsinization followed by centrifugation. Collected cells were incubated in 0.075mM NaCl hypotonic solution for 30 mins at 37°C. Following swelling in hypotonic solution, cells were washed in 3:1 methanol:acetic acid fix solution 3 times and resuspended in 50-200 $\mu$ l of fix solution and stored at -20°C. Slides were generated by

adding 7µl of fixed metaphase cells to a clean glass slide and spread by tilting the slide. The slide was subsequently held cells-side down over a boiling water bath for 5 seconds and then transferred to a heating block set at 90°C for 2-5 min. Slides were allowed to dry at room temperature overnight. Dried slides were stained with Geimsa (Sigma) or transferred to -20°C for storage prior to spectral karyotyping.

### **Spectral Karyotyping**

Metaphase spreads were prepared and hybridized with SKYPaint Probe Mixture for Mouse Chromosomes (Applied Spectral Imaging) according to manufacturer instructions. After hybridization, slides were visualized with an Olympus BX61 microscope equipped with an ASI Spinning Disk Attachment (Applied Spectral Imaging). Images were then analyzed with SkyView 2.1.1 software (Applied Spectral Imaging)

### **Transcript Array**

RNA was isolated from early passage ( $\leq 3$ ) cell lines by Trizol (Invitrogen). 5µg of total RNA was then reverse transcribed and labeled with GeneChip One-Cycle Target Labeling and Control Reagents as recommended by the manufacture (Affymetix) and hybridized to Affy Mouse 430A 2.0 Arrays (Affymetix). Chips were analyzed and data was extracted for examination by GeneChip Operating Software (Affymetix).

### **Expression Analysis**

Affymetrix data analysis was performed using statistical tools provided by the r/Bioconductor projects (<http://cran.r-project.org/>; <http://www.bioconductor.org/>). Data import and quality control assessment was done using the Affy package (*S2*) and the AffymGUI package (*S3*). Data was summarized and normalized using gcRMA (*S4*). Genes expressed at significantly different levels in the trisomies vs. wild-type, trisomy 13 vs wild-type and trisomy 16 vs wild-type comparisons were identified using the local pooled error test (LPE) with the BH correction to control for multiple hypothesis (*S5*). The commands for these differential expression tests and the related data file are available here ([lpe.tar.gz](#)). The summarized expression data (log<sub>2</sub> scale) and differential expression results included in Table S1.

The boxplots summarizing fold change data by chromosomes were created in R. Two different sets of plots were created. The “expressed” set includes only expressed probes with average expression  $> 3$  and variance across all samples  $< 0.2$ . “All” plots include all of the data. In all cases, fold change data were obtained by subtracting the average wild-type value from the average trisomy value (or the value itself if multiple data points were not available). Probes unmapped to specific chromosomes and those mapping to the Y chromosome were excluded. The commands and data required to create these plots are available here (boxplots.tar.gz).

### **Gene Set Enrichment Analysis (GSEA)**

GSEA (<http://www.broad.mit.edu/gsea/>) was used to assess the significance of the increase in gene expression observed on the trisomic chromosomes. In comparisons between trisomic samples and wild-type samples, the gene set consisting of genes encoded by the trisomic chromosome has the highest normalized enrichment score and confidence values that approach 0. The files required for these comparisons and the results are available here (gsea.tar.gz).

### **Analysis of Functional Annotations**

The GO Tree Machine (<http://bioinfo.vanderbilt.edu/gotm/frame.php>) was used to compare the functional annotations attached to differentially expressed genes in the Ts13 vs. wild-type comparison with those annotations attached to all gene products interrogated by the MOE\_430A\_2 chip.

### **Accumulation assays.**

Exponentially growing early passage MEFs were plated at a density of  $1 \times 10^5$  cells on individual wells of multiple 6-well plates. All cells were plated in a final volume of 3 ml of medium. Each day wells were trypsinized and counted in triplicate. For “fed” cultures, the medium was aspirated and replaced with fresh medium every other day throughout the course of the experiment. Statistical analysis was performed using a 2-way nested ANOVA with all data points from days 3, 5, and 7. The data of all

accumulation assays employed for these statistical analyses are shown in Supplemental Table 4.

### **Metabolic Analysis**

Different components of 1.5 mls of tissue culture medium were analyzed with an MBS7100 (YSI) according to the manufacturers specifications. To prepare samples for analysis, the medium was collected from the cells and cleared by centrifugation. The supernatant was transferred to a fresh tube and samples were kept at -20°C until analyzed. To determine the amount of analyte produced or used in the medium, all samples were compared to identical medium that was not exposed to cells. Statistical analysis was performed using a 2-way nested ANOVA with all data points obtained from days 3, 5, and 7 of the accumulation assays. The data of all accumulation assays employed for these statistical analyses are shown in Supplemental Table 4.

### **Cell volume Determination.**

Cellular volume was determined using a Multisizer 3 Coulter Counter (Becton Dickinson) counting 5000 events according to the manufacturer instructions.

### **Cell Cycle Analysis**

Exponentially growing cells  $\leq p5$  were collected by trypsinization followed by centrifugation. Cells were fixed in 70% ethanol and stored at -20°C until analyzed. Cells were then resuspended in propidium iodide and RNaseA in PBS. For each cell line at least 20,000 events were collected on a FACScan Flowcytometer (Becton Dickinson). Cell cycle analysis was determined using FloJo software (Tree Star Inc.).

### **Proliferation Assays.**

To determine the proliferative capacity and spontaneous immortalization of cell lines we used a modified serial passaging protocol as in Todaro and Green (S6). Briefly, passage 3 MEFs were plated on two 6-well plates (12 wells total) at a density of  $5 \times 10^5$  cells per well. Cells were allowed to grow, and on day 3 cells were trypsinized and counted for

the number of cells per well. Cells were then pooled and replated at  $5 \times 10^5$  cells per well. This process was repeated until there were either not enough cells to plate, or until immortalization (determined by an increase in cell proliferation) had taken place. The passage when immortalization had taken place was determined by modeling the doublings per passage and fitting them using the following equation using Prism software (Graphpad Software).

$$Y1 = \text{slope1} * x + \text{intercept1}$$

$$\text{intercept2} = \text{slope1} * x_0 + \text{intercept1}$$

$$Y2 = \text{slope2} * (x - x_0) + \text{intercept2}$$

$$Y = \text{IF}( (x < x_0), y1, y2)$$

### **Senescence-associated $\beta$ -galactosidase assays**

Identification of senescent cells was performed using established protocols (S7). Briefly, cells on tissue culture plates were washed three times with PBS and fixed with 3% formaldehyde in PBS for 5 minutes. The cells were then washed three times with PBS, and incubated overnight at 37°C with freshly prepared staining solution (37mM Citric acid, 126mM Na<sub>2</sub>HPO<sub>4</sub>, 1mg/ml X-Gal, 5mM K<sub>4</sub>Fe(CN)<sub>6</sub>, 5mM K<sub>3</sub>Fe(CN)<sub>6</sub>, 150mM NaCl, 2mM MgCl<sub>2</sub>). Cells were visualized by light microscopy.

Fig. S1

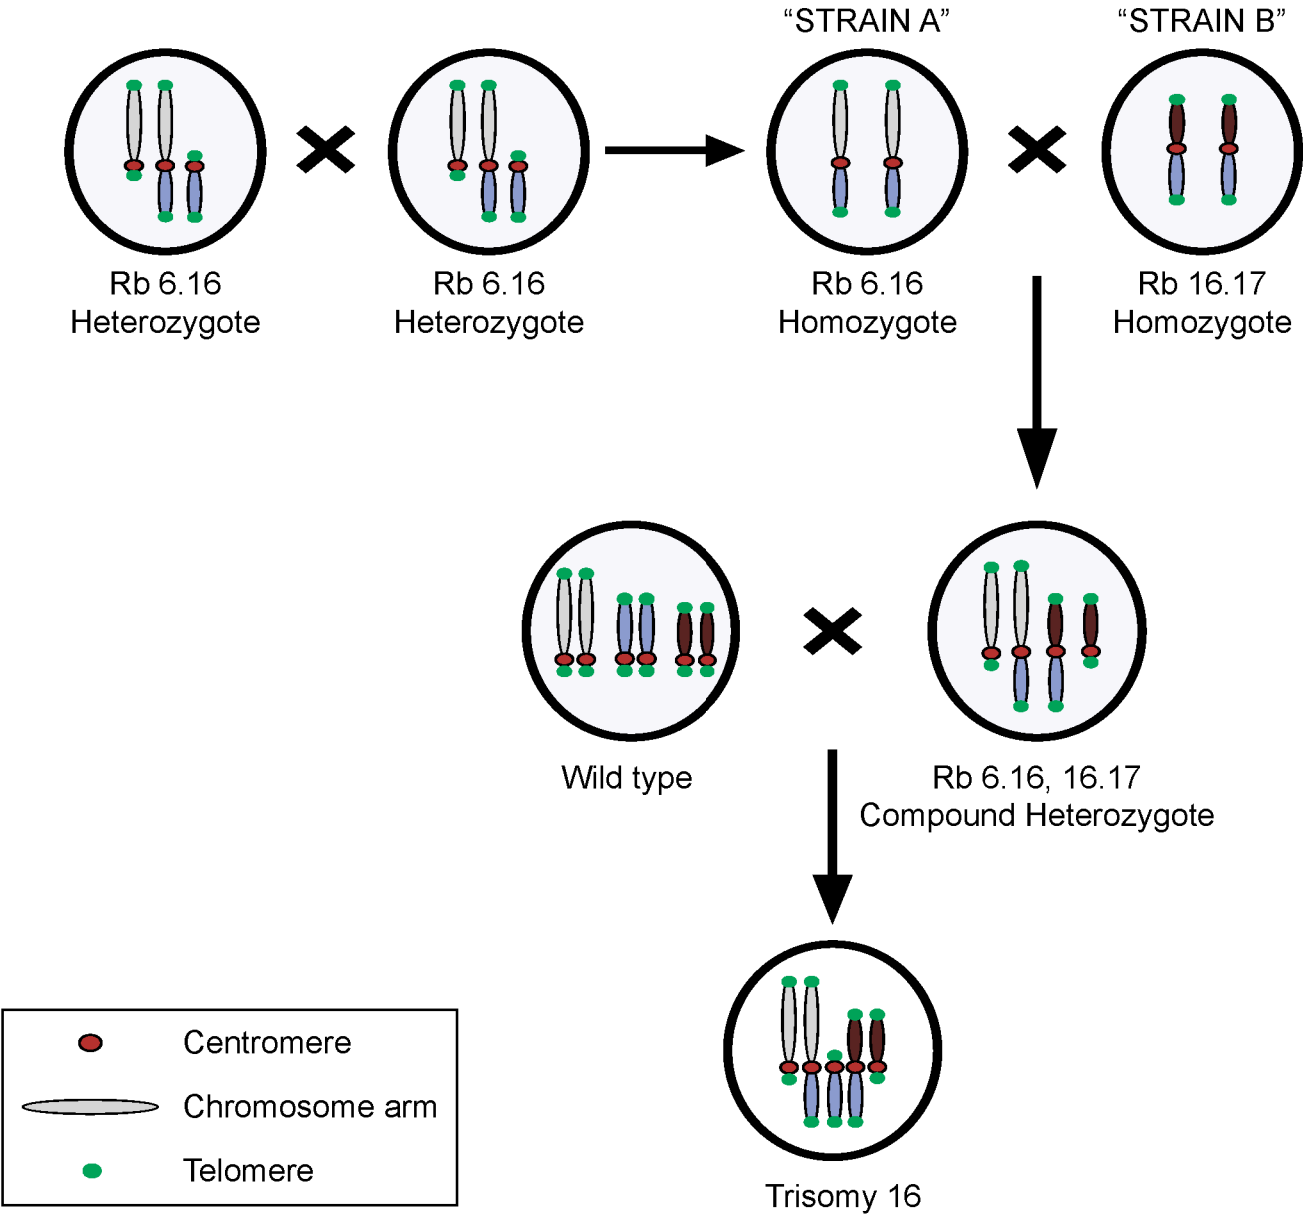

# Fig. S2

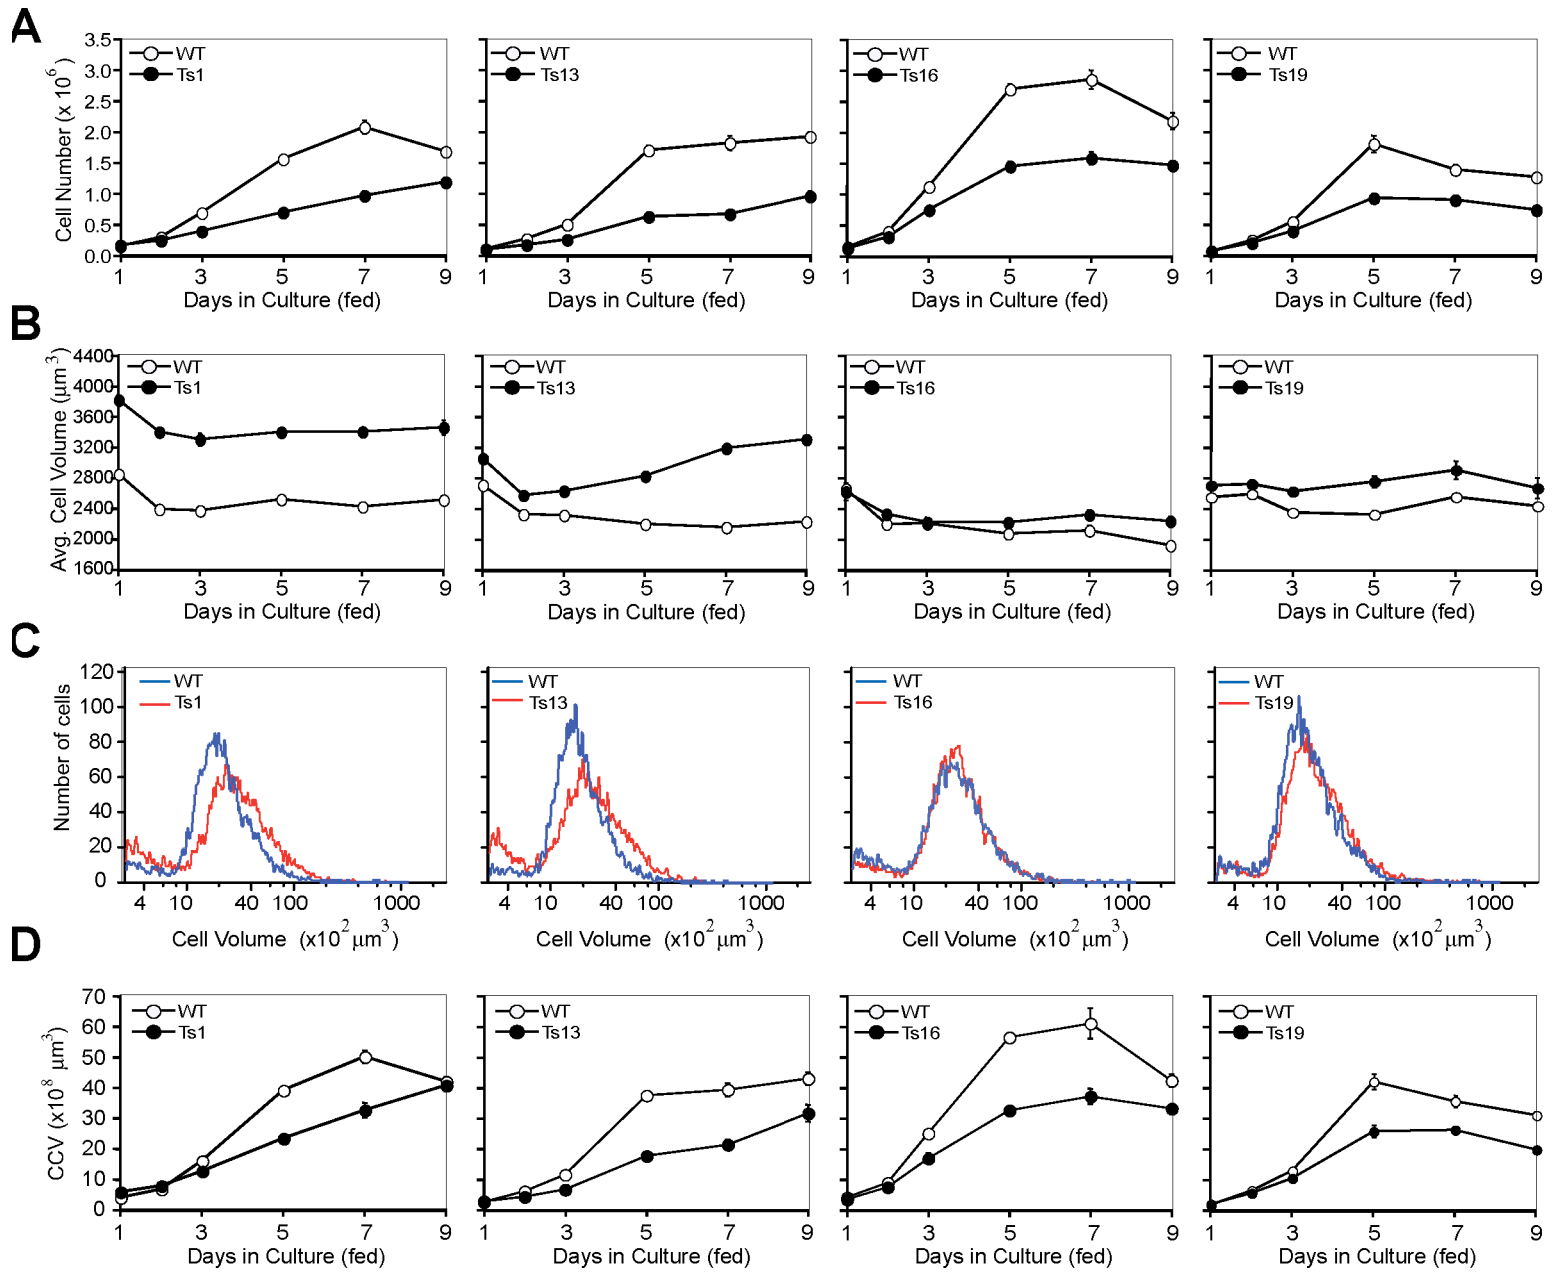

# Fig. S3

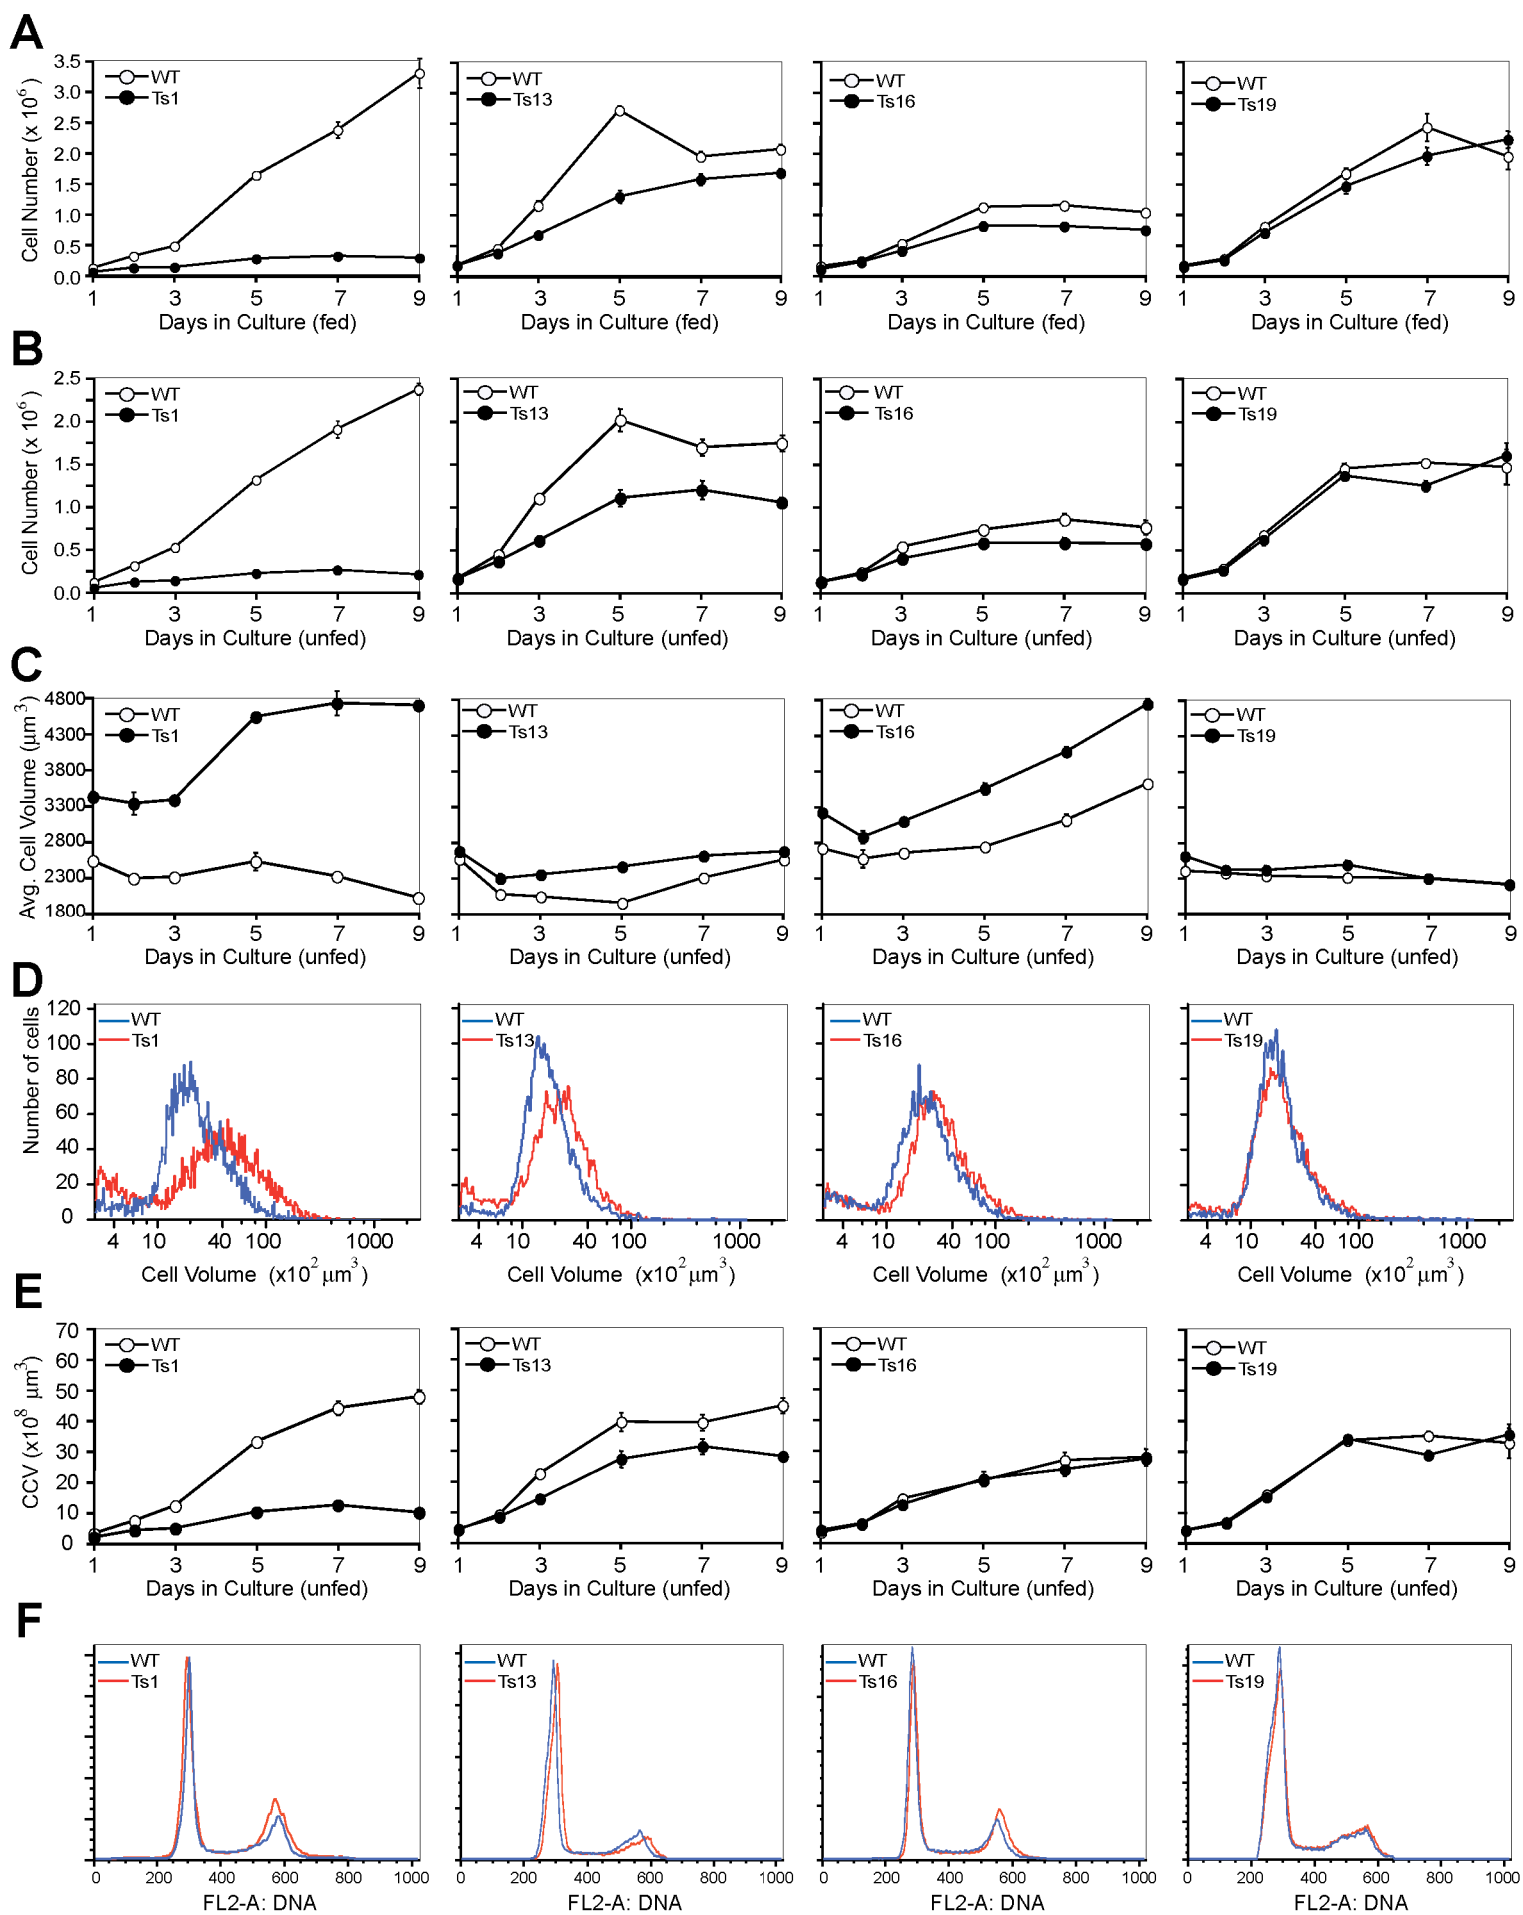



# Fig. S4

## A

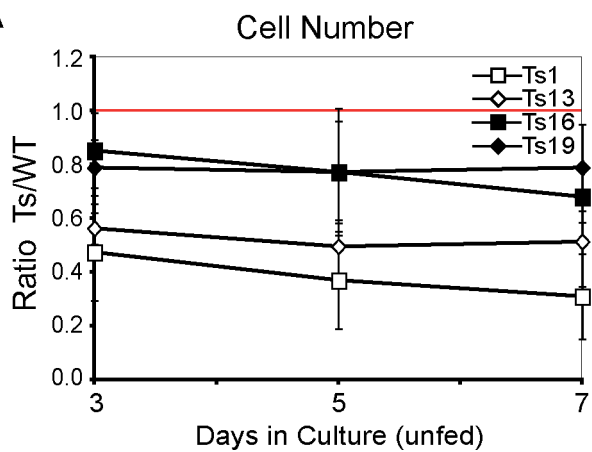

## B

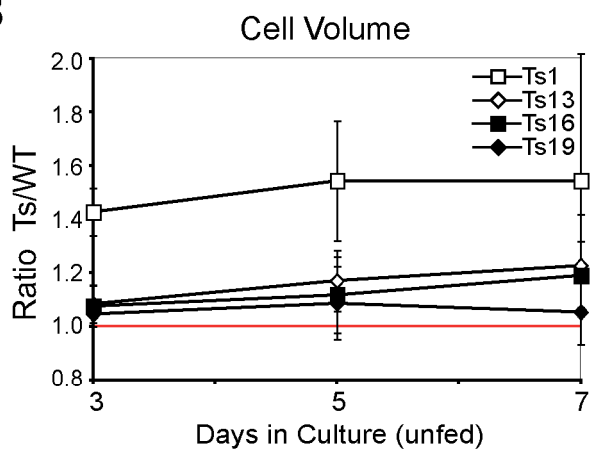

## C

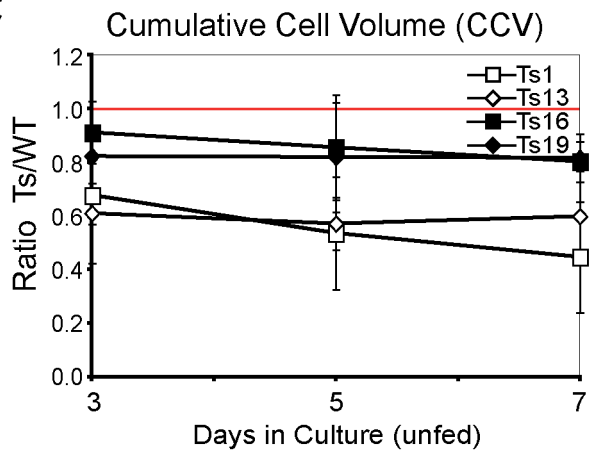

# Fig. S5

## A

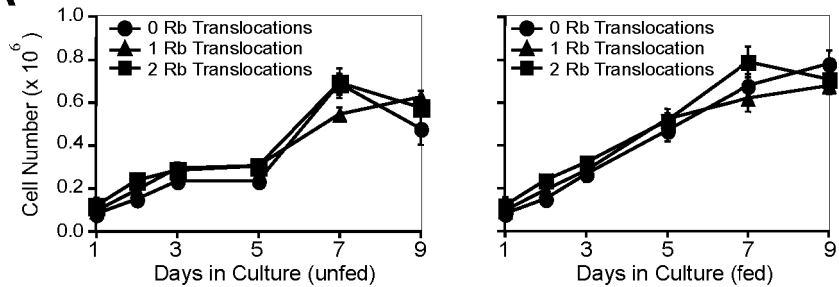

## B

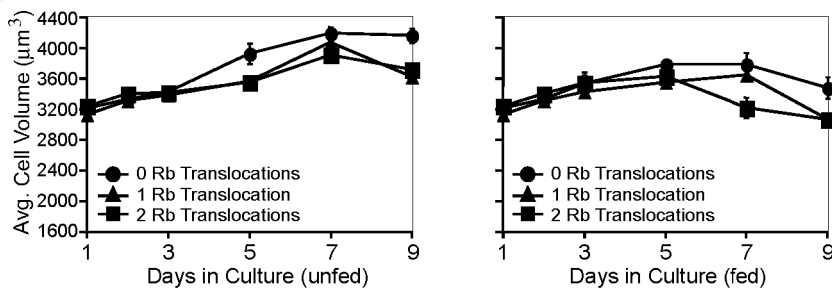

## C

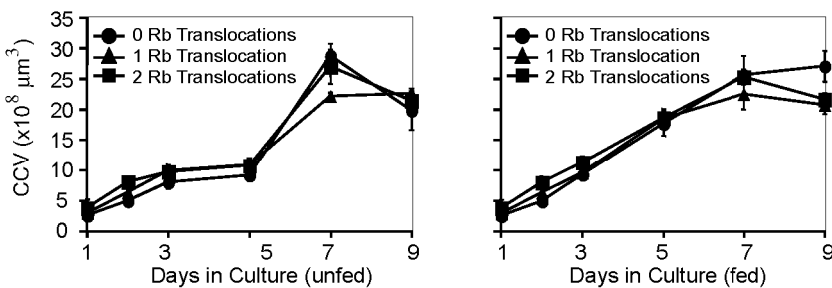

## D

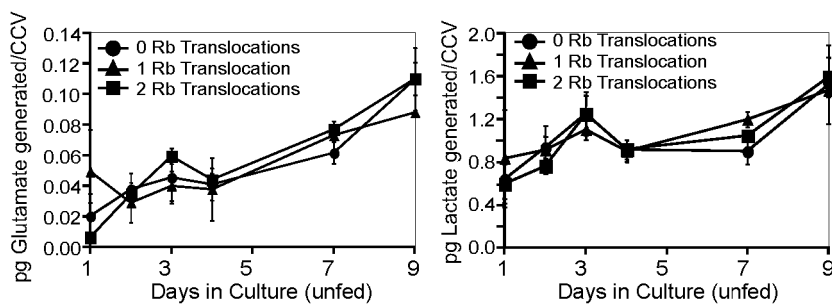

Fig. S6

A

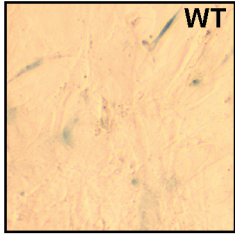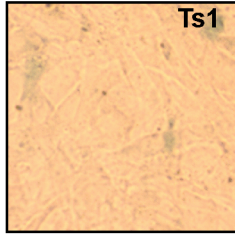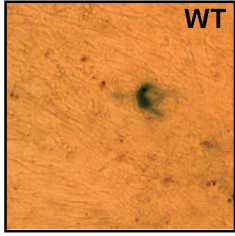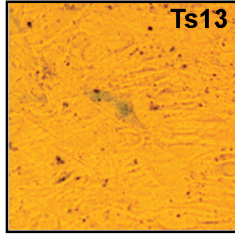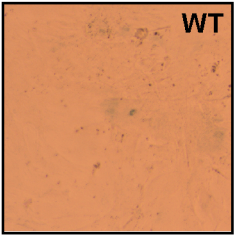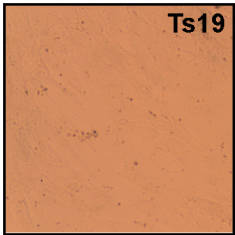

# Fig. S7

## A

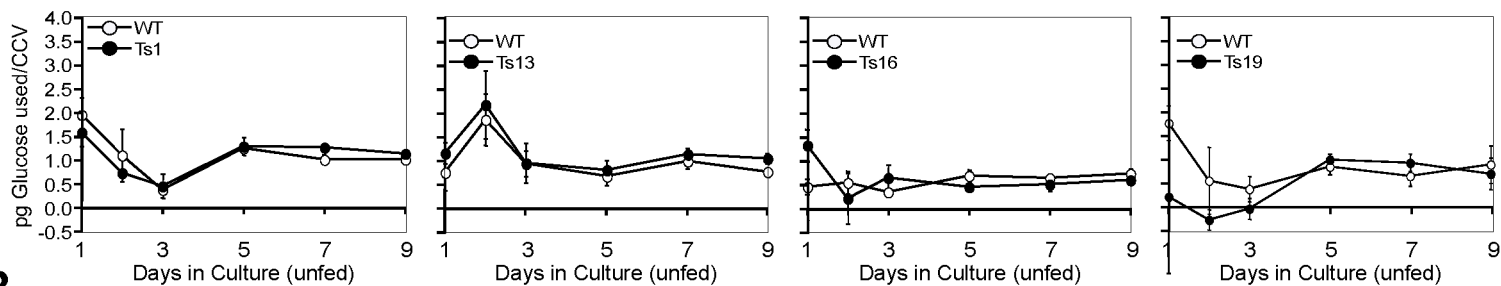

## B

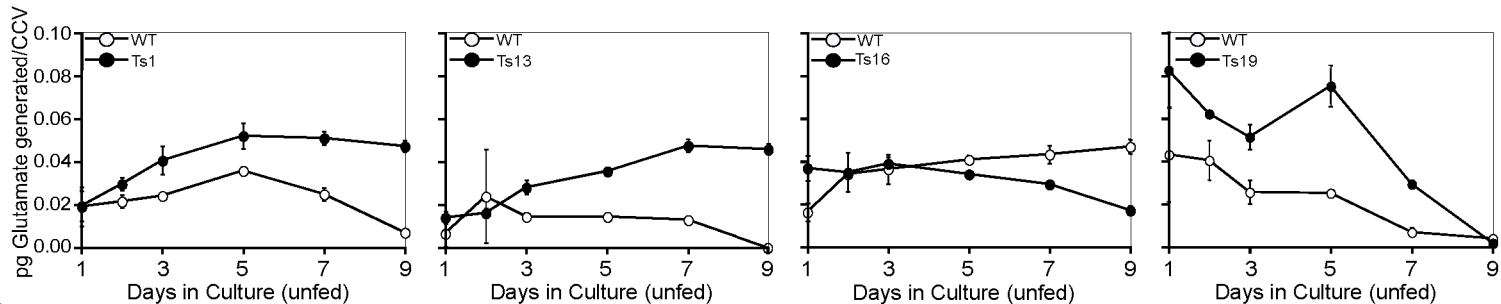

## C

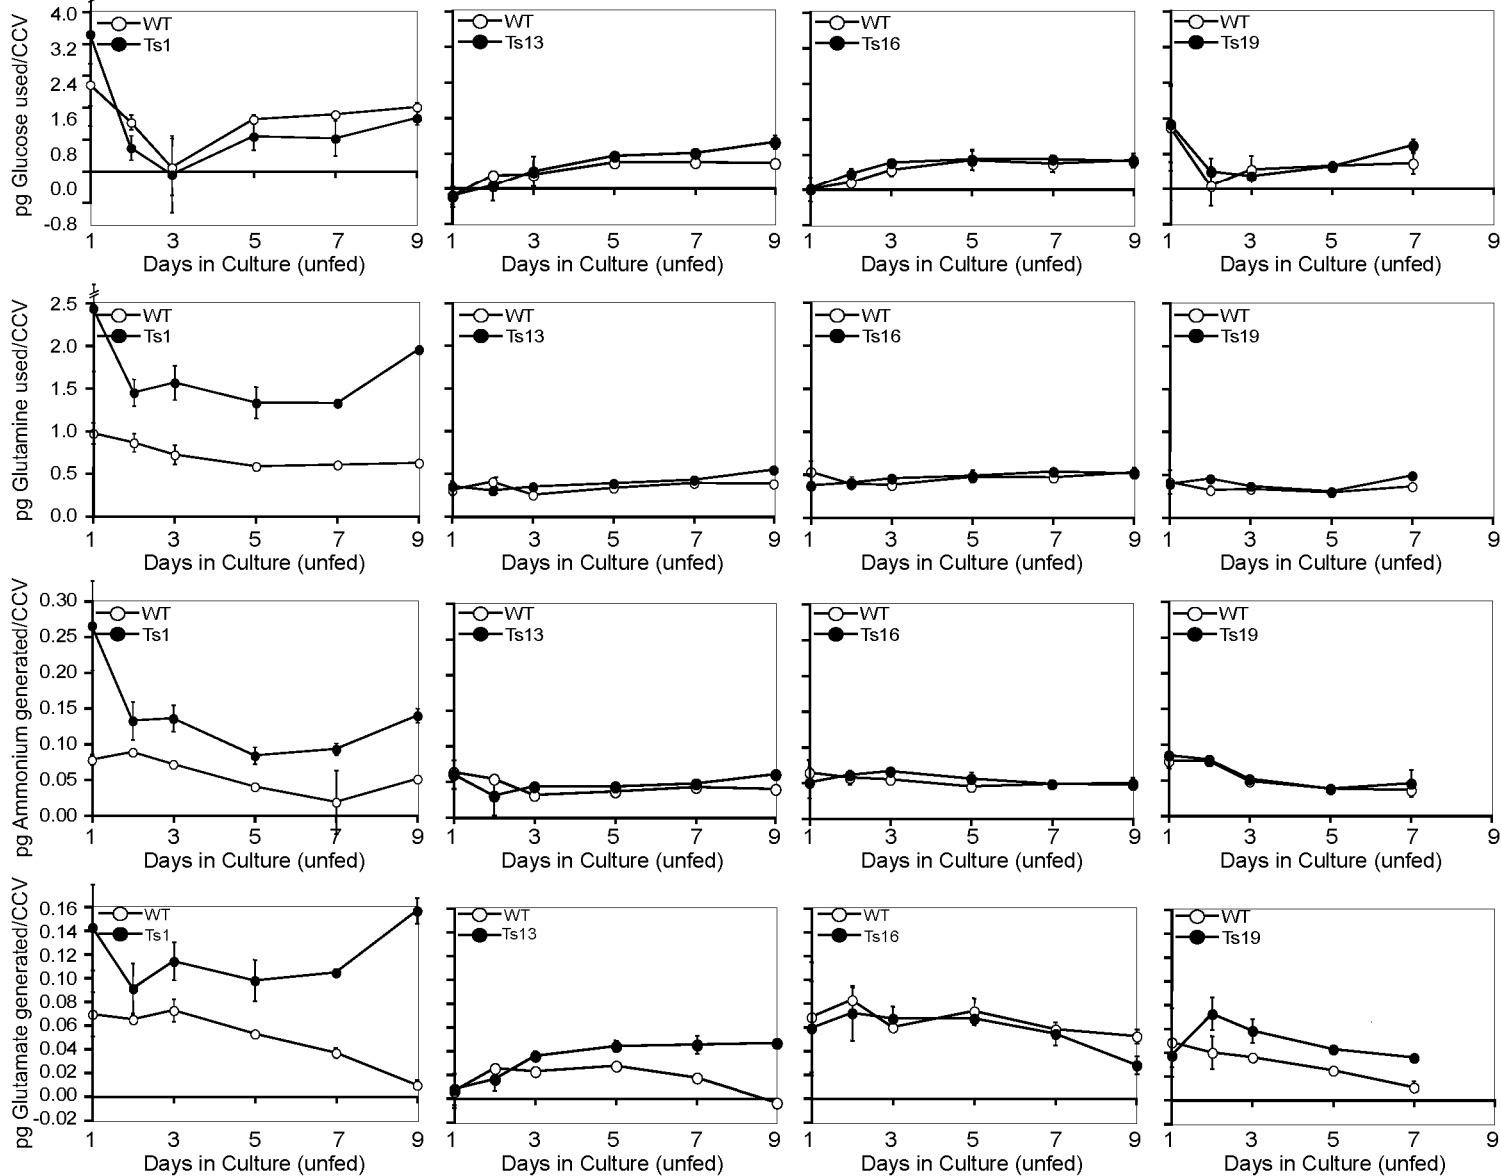

Fig. S8

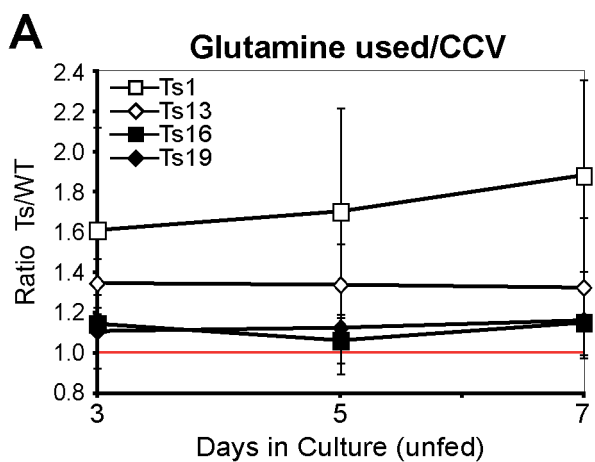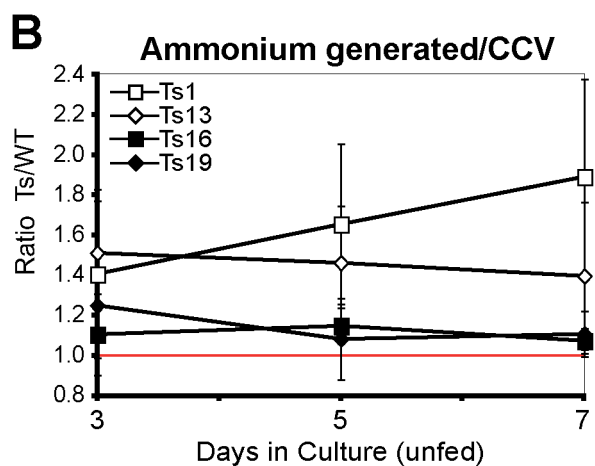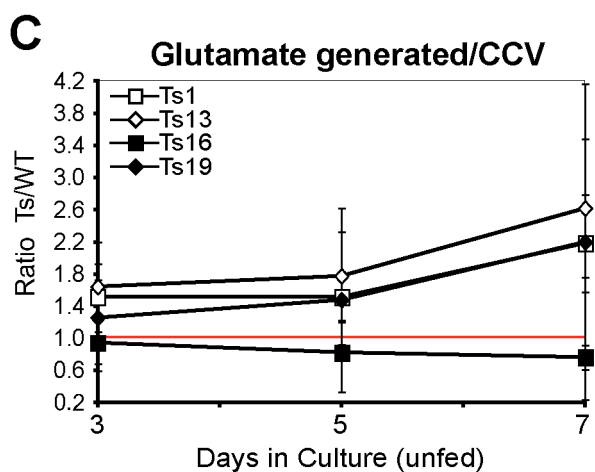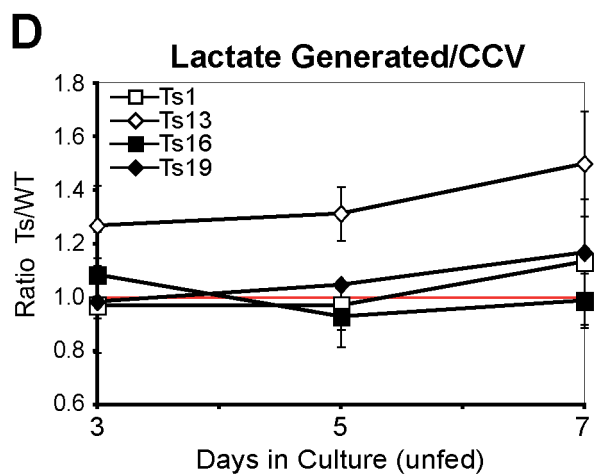

Fig. S9

A

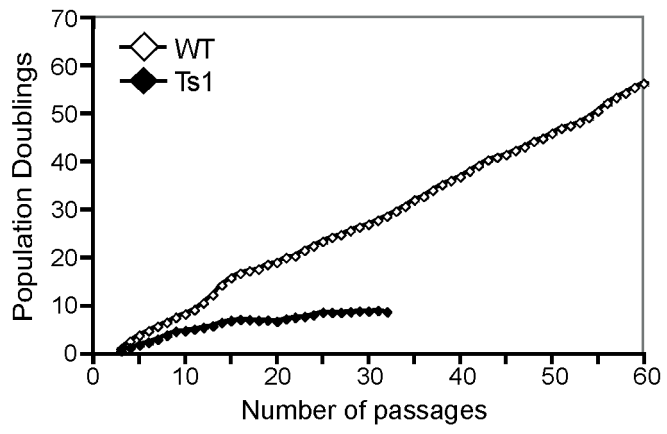

### **Supplemental Figures:**

#### **Supplemental Figure 1: The breeding scheme used to generate trisomic embryos using trisomy 16 as an example.**

Homozygous mouse strains carrying a Robertsonian translocation (Rb) between chromosome 16 and 6 [Rb(6.16); Strain A] were mated with Rb(16.17) homozygous animals (Strain B) to obtain Rb(6.16)/Rb(16.17) compound heterozygous mice. These compound heterozygous mice were then mated to wild-type mice. A meiotic non-disjunction event occurring in the male germ line of the compound Rb(6.16)/Rb(16.17) heterozygote will result in offspring that are trisomic for the chromosome common to the Rb fusion chromosomes. Similar breeding schemes were used to generate the other trisomic embryos and cell lines in this study.

#### **Supplemental Figure 2: Effects of aneuploidy on cell proliferation when the medium is changed every two days.**

Wild-type and trisomic cell lines were plated and grown with the medium changed every other day (S8), Wild-type (open circles) and trisomic cells (closed circles) were analyzed daily to determine cell number (A), cell volume (B), the distribution of cell volumes in the culture at day 5 (C) and cumulative cell volume (CCV), i.e. number of cells x average cell volume (D). Note that the absence of small size particles in (D) indicates that cells are not undergoing lysis. The data for each column come from the same cell line.

#### **Supplemental Figure 3: Proliferation defects in independent trisomic MEFs.**

Wild type (open circles) and Ts cells (closed circles) that originated from embryos of independent crosses were analyzed as described in Fig. 2. The data for each column come from the same cell line. The examples shown for trisomy 16 and 19 represent cases where the effects of the extra chromosome on cell proliferation and CCV were subtle or not detectable.

(A; B) Growth of early passage (p3) trisomic cells under “fed” (A; medium was changed every two days) or “unfed” (B; medium was not changed) conditions.

(C, D) C shows the average cell volume of cells under growth conditions where the medium was not changed (unfed) and D the distribution of cell volumes in the culture at day 5 of the accumulation assay. Note that the low amounts of small size particles in (D) indicates that cells are not undergoing lysis.

(E) Analysis of the cumulative cell volume during the accumulation assay.

(F) DNA content analysis of wild-type and trisomic cells passage 2.

**Supplemental Figure 4: Summary of the proliferation characteristics in trisomic cells shown as the ratio between Ts and wild-type cells.**

The ratio of cell number (A), cell volume (B) and cumulative cell volume (CCV) (C) between trisomic and wild-type cells was determined for each experiment (Ts1 N=3, Ts13 N=4, Ts16 N=4, Ts19 N=4). The graph shows the mean of these ratios. Error bars are +/- SD. A value of 1 indicates no difference between trisomic and wild-type cells, a value below 1 indicates a decrease in the trisomic cells, a value above 1 an increase.

**Supplemental Figure 5: Robertsonian chromosomes do not affect cell proliferation and metabolism.**

Wild-type cells (0 Robertsonian translocations; closed circles), cells carrying one Robertsonian chromosome (1 Robertsonian translocation; closed triangles) and cells carrying two Robertsonian chromosomes (2 Robertsonian translocations; closed squares) were grown and analyzed as described in Figure 2 and either medium was not changed (unfed) or changed every two days (fed). Samples were taken at the indicated times to determine cell number (A), cell volume (B), cumulative cell volume (C) and glutamate and lactate production (D).

**Supplemental Figure 6: Senescence-associated  $\beta$ -galactosidase staining is not altered in cultures of trisomic cells.**

Examples of  $\beta$ -galactosidase staining of Ts1 (passage 3; A), Ts13 (passage 4; B) and Ts19 (passage 5; B) and littermate controls are shown.  $\beta$ -galactosidase staining is shown in blue.



**Supplemental Figure 7: Additional examples of the metabolic characteristics of Ts cell lines in unfed accumulation assays.**

(A, B) The amount of glucose uptake (A) and glutamate generated (B) per CCV in the tissue culture supernatants of cells analyzed in Figure 3A - C was examined at the indicated times. (C) Examples of trisomic cells in which the alterations in metabolic activity were subtle or not detectable. Tissue culture supernatants of the experiments shown in Fig. S3 were subjected to metabolic analyses (S8) and the amount of glucose (top panels) and glutamine (second panels) used and ammonium (third panels) and glutamate (bottom panels) generated per CCV was determined at the indicated times.

**Supplemental Figure 8: Summary of the metabolic analyses in trisomic cells shown as the ratio between Ts and wild-type cells.**

The ratio of glutamine use (A), and ammonium (B), glutamate (C) and lactate (D) production between trisomic and wild-type cells was determined per CCV for each experiment (Ts1 N=3, Ts13 N=4, Ts16 N=3, and Ts19 N=4). The graph shows the mean of these ratios. Error bars are +/- SD. A value of 1 indicates no difference between trisomic and wild-type cells, a value below 1 indicates a decrease in the trisomic cells, a value above 1 an increase.

**Supplemental Figure 9: Rate of spontaneous immortalization of primary Ts1 MEFs.**

Cells were serially passed in a 3T3 immortalization assay (S8) and the number of population doublings are shown as a function of number of passages.

## Supplemental Table 2

### Analysis of Functional Annotations

The GO Tree Machine (<http://bioinfo.vanderbilt.edu/gotm/frame.php>) was used to compare the functional annotations attached to differentially expressed genes in the Ts13 vs. wild-type comparison with those annotations attached to all gene products interrogated by the MOE\_430A\_2 chip

| Ontology              | Term                                               | Observed | Expected | Ratio | Pval        |
|-----------------------|----------------------------------------------------|----------|----------|-------|-------------|
| In cellular component | cytoplasm                                          | 95       | 63.83    | 1.49  | 2.52766E-06 |
| In cellular component | cytoplasmic part                                   | 76       | 47.65    | 1.59  | 4.31844E-06 |
| In cellular component | extracellular matrix (sensu Metazoa)               | 16       | 4.65     | 3.44  | 1.59183E-05 |
| In molecular function | structural molecule activity                       | 25       | 9.88     | 2.53  | 1.69482E-05 |
| In cellular component | extracellular matrix                               | 16       | 4.74     | 3.38  | 2.01878E-05 |
| In biological process | biosynthesis                                       | 39       | 20.42    | 1.91  | 4.6283E-05  |
| In cellular component | microfibril                                        | 3        | 0.11     | 27.27 | 0.000106393 |
| In molecular function | translation factor activity\, nucleic acid binding | 9        | 1.91     | 4.71  | 0.00011786  |
| In molecular function | translation regulator activity                     | 9        | 2        | 4.5   | 0.000165627 |
| In molecular function | metalloendopeptidase inhibitor activity            | 3        | 0.13     | 23.08 | 0.000186417 |
| In biological process | cellular biosynthesis                              | 34       | 17.99    | 1.89  | 0.000192036 |
| In cellular component | fibril                                             | 3        | 0.13     | 23.08 | 0.000209281 |
| In cellular component | intracellular non-membrane-bound organelle         | 41       | 23.44    | 1.75  | 0.00022016  |
| In cellular component | non-membrane-bound organelle                       | 41       | 23.44    | 1.75  | 0.00022016  |
| In molecular function | translation initiation factor activity             | 7        | 1.25     | 5.6   | 0.000226768 |
| In cellular component | extracellular matrix part                          | 8        | 1.72     | 4.65  | 0.000303912 |
| In cellular component | cytosol                                            | 17       | 6.62     | 2.57  | 0.000331688 |
| In biological process | protein metabolism                                 | 68       | 47.53    | 1.43  | 0.000534428 |
| In biological process | protein biosynthesis                               | 22       | 10.28    | 2.14  | 0.000584449 |
| In biological process | macromolecule metabolism                           | 86       | 64.46    | 1.33  | 0.000676011 |
| In cellular component | ribonucleoprotein complex                          | 17       | 7.11     | 2.39  | 0.000752646 |
| In cellular component | secretory granule membrane                         | 3        | 0.2      | 15    | 0.000836289 |

| Ontology              | Term                                                       | Observed | Expected | Ratio | Pval        |
|-----------------------|------------------------------------------------------------|----------|----------|-------|-------------|
| In biological process | macromolecule biosynthesis                                 | 23       | 11.43    | 2.01  | 0.001015629 |
| In biological process | actin cytoskeleton organization and biogenesis             | 9        | 2.66     | 3.38  | 0.001361624 |
| In biological process | positive regulation of nitric oxide biosynthesis           | 2        | 0.06     | 33.33 | 0.001379166 |
| In biological process | cortical cytoskeleton organization and biogenesis          | 3        | 0.24     | 12.5  | 0.001450138 |
| In biological process | cellular protein metabolism                                | 63       | 44.86    | 1.4   | 0.001591974 |
| In biological process | translation                                                | 9        | 2.75     | 3.27  | 0.00170316  |
| In biological process | organelle organization and biogenesis                      | 29       | 16.46    | 1.76  | 0.001805824 |
| In biological process | branching morphogenesis of a tube                          | 5        | 0.91     | 5.49  | 0.002004004 |
| In molecular function | growth factor activity                                     | 9        | 2.81     | 3.2   | 0.002020676 |
| In cellular component | actin cytoskeleton                                         | 10       | 3.37     | 2.97  | 0.002023397 |
| In biological process | cellular macromolecule metabolism                          | 63       | 45.47    | 1.39  | 0.002252247 |
| In biological process | morphogenesis of a branching structure                     | 5        | 0.95     | 5.26  | 0.002470752 |
| In biological process | actin filament-based process                               | 9        | 2.92     | 3.08  | 0.002591493 |
| In molecular function | actin binding                                              | 11       | 4.08     | 2.7   | 0.002625215 |
| In biological process | regulation of cAMP metabolism                              | 2        | 0.09     | 22.22 | 0.00271894  |
| In biological process | neuromuscular physiological process                        | 2        | 0.09     | 22.22 | 0.00271894  |
| In molecular function | polysaccharide binding                                     | 6        | 1.55     | 3.87  | 0.004401433 |
| In molecular function | CoA desaturase activity                                    | 2        | 0.11     | 18.18 | 0.004402233 |
| In molecular function | stearoyl-CoA 9-desaturase activity                         | 2        | 0.11     | 18.18 | 0.004402233 |
| In biological process | regulation of cyclic nucleotide metabolism                 | 2        | 0.11     | 18.18 | 0.004467048 |
| In biological process | synaptic vesicle transport                                 | 3        | 0.35     | 8.57  | 0.004544293 |
| In biological process | response to heat                                           | 3        | 0.35     | 8.57  | 0.004544293 |
| In cellular component | zymogen granule membrane                                   | 2        | 0.11     | 18.18 | 0.004753858 |
| In biological process | actin filament polymerization                              | 3        | 0.37     | 8.11  | 0.005431038 |
| In molecular function | structural constituent of ribosome                         | 9        | 3.27     | 2.75  | 0.005453345 |
| In molecular function | pattern binding                                            | 6        | 1.63     | 3.68  | 0.005739269 |
| In biological process | regulation of biosynthesis                                 | 8        | 2.75     | 2.91  | 0.006232064 |
| In biological process | cell proliferation                                         | 16       | 8.01     | 2     | 0.006425686 |
| In cellular component | cytosolic part                                             | 6        | 1.68     | 3.57  | 0.006477502 |
| In biological process | regulation of actin polymerization and/or depolymerization | 4        | 0.76     | 5.26  | 0.006597145 |
| In biological process | regulation of actin filament length                        | 4        | 0.76     | 5.26  | 0.006597145 |
| In biological process | regulation of nitric oxide biosynthesis                    | 2        | 0.13     | 15.38 | 0.00660536  |

| Ontology              | Term                                        | Observed | Expected | Ratio | Pval        |
|-----------------------|---------------------------------------------|----------|----------|-------|-------------|
| In molecular function | cytoskeletal protein binding                | 13       | 5.95     | 2.18  | 0.006753222 |
| In molecular function | extracellular matrix structural constituent | 5        | 1.2      | 4.17  | 0.006855044 |
| In cellular component | intracellular part                          | 139      | 121.86   | 1.14  | 0.006963264 |
| In cellular component | zymogen granule                             | 2        | 0.13     | 15.38 | 0.00702603  |
| In biological process | cell organization and biogenesis            | 44       | 30.7     | 1.43  | 0.007082138 |
| In biological process | translational initiation                    | 4        | 0.8      | 5     | 0.00804722  |
| In cellular component | contractile fiber                           | 5        | 1.25     | 4     | 0.008047324 |
| In cellular component | cytoskeleton                                | 23       | 13.57    | 1.69  | 0.008755605 |
| In biological process | protein polyubiquitination                  | 2        | 0.15     | 13.33 | 0.009116342 |
| In biological process | regulation of nucleotide metabolism         | 2        | 0.15     | 13.33 | 0.009116342 |
| In biological process | eating behavior                             | 2        | 0.15     | 13.33 | 0.009116342 |
| In cellular component | leading edge                                | 5        | 1.3      | 3.85  | 0.009314195 |
| In molecular function | calcium ion binding                         | 22       | 12.85    | 1.71  | 0.009329813 |
| In molecular function | insulin-like growth factor binding          | 3        | 0.45     | 6.67  | 0.009773724 |
| In cellular component | lamellipodium                               | 4        | 0.85     | 4.71  | 0.009867445 |
| In biological process | protein folding                             | 9        | 3.59     | 2.51  | 0.0099209   |

### Supplemental Table 3

| Cell Line | Passage | Cells Counted | Ave. Chromosome Arms | Std. Dev. | Wilcoxon Rank p (two-sided) |
|-----------|---------|---------------|----------------------|-----------|-----------------------------|
| WT-1      | 44      | 81            | 127.8                | 23.3      | 3.09x10 <sup>-10</sup>      |
| Ts13-1    | 44      | 17            | 79.8                 | 4.4       |                             |
| WT-2      | 40      | 28            | 80.0                 | 8.0       | 4.19x10 <sup>-5</sup>       |
| Ts13-2    | 40      | 64            | 74.4                 | 24.0      |                             |
| WT-3      | 41      | 58            | 66.8                 | 22.8      | 0.44                        |
| Ts13-3    | 41      | 23            | 71.0                 | 31.4      |                             |
|           |         |               |                      |           |                             |
| WT-1      | 40      | 53            | 76.1                 | 22.1      | 0.30                        |
| Ts16-1    | 40      | 71            | 77.0                 | 23.2      |                             |
| WT-2      | 39      | 23            | 76.1                 | 22.3      | 1.82x10 <sup>-05</sup>      |
| Ts16-2    | 39      | 53            | 109.1                | 33.0      |                             |
| WT-3      | 46      | 39            | 106.2                | 23.5      | 5.68x10 <sup>-11</sup>      |
| Ts16-3    | 46      | 30            | 63.3                 | 14.3      |                             |
|           |         |               |                      |           |                             |
| WT-1      | 35      | 32            | 76.3                 | 13.8      | 0.03                        |
| Ts19-1    | 35      | 62            | 79.7                 | 11.8      |                             |

#### Analysis of the chromosome number in spontaneously immortalized MEF cultures.

Each set represents independent, littermate matched trisomic and wild type cell line pairs, carried through a 3T3 protocol until immortalization. Metaphase spreads were prepared from post-immortalization cultures. The number of chromosome arms was determined by counting all arms (one Robertsonian translocation chromosome yields 2 chromosome arms). Note: while the differences might be significant between the immortalized wild-type and trisomic MEF cultures within a given experiment, the differences are not consistent across all immortalized cell lines.

## Supplemental References

- S1. B. R. Williams *et al.*, *Curr Biol* **12**, 648 (Apr 16, 2002).
- S2. B. M. Bolstad, Collin, F., Brettschneider, J., Simpson, L., Cope, L. Irizarry, R. A. and Speed, T. P., in *Bioinformatics and computational biology solutions using R and Bioconductor* V. C. R. Gentleman, S. Dudoit, R. Irizarry, W. Huber, Ed. (Springer Science+Business Media, New York, 2005) pp. 33-47.
- S3. G. K. Smyth, in *Bioinformatics and computational biology solutions using R and Bioconductor* V. C. R. Gentleman, S. Dudoit, R. Irizarry, W. Huber, Ed. (Springer Science+Business Media, New York, 2005) pp. 397-420.
- S4. B. M. Bolstad, Irizarry, R. A., Gautier, L. and Wu, Z, in *Bioinformatics and computational biology solutions using R and Bioconductor* V. C. R. Gentleman, S. Dudoit, R. Irizarry, W. Huber, Ed. (Springer Science+Business Media, New York, 2005) pp. 13-32.
- S5. N. Jain *et al.*, *Bioinformatics* **19**, 1945 (Oct 12, 2003).
- S6. G. J. Todaro, H. Green, *J Cell Biol* **17**, 299 (May, 1963).
- S7. G. P. Dimri *et al.*, *Proc Natl Acad Sci U S A* **92**, 9363 (Sep 26, 1995).
- S8. See Supporting Online Material.
